# Supplementary material for: An Engineered Thermostable Laccase with Great Ability to Decolorize and Detoxify Malachite Green
Source: MDPI journal article supplement (doi:10.3390/ijms222111755), 2021-10-29
Supplement: s1 [file s1]

Supplementary materials to

# An Engineered Thermostable Laccase with Great Ability to Decolorize and Detoxify Malachite Green

Guotao Mao <sup>1,2</sup>, Kai Wang <sup>1</sup>, Fangyuan Wang <sup>1</sup>, Hao Li <sup>1</sup>, Hongsen Zhang <sup>1,2</sup>, Hui Xie <sup>1,2</sup>, Zhimin Wang <sup>3</sup>, Fengqin Wang <sup>1,2</sup> and Andong Song <sup>1,2,\*</sup>

<sup>1</sup> Department of Microbiology, College of Life Sciences, Henan Agricultural University, Zhengzhou 450002, China; maoguotao@henau.edu.cn (G.M.); kaiwang@stu.henau.edu.cn (K.W.); wangfangyuan@ct-bio.com (Fangyuan Wang); haoli2021@stu.henau.edu.cn (H.L.); hszhang@henau.edu.cn (H.Z.); xiehuiliving421@vip.sina.com (H.X.); w\_fengqin@henau.edu.cn (Fengqin Wang)

<sup>2</sup> The Key Laboratory of Enzyme Engineering of Agricultural Microbiology, Ministry of Agriculture, Henan Agricultural University, Zhengzhou 450002, China

<sup>3</sup> Department of Applied Chemistry, College of Science, Henan Agricultural University, Zhengzhou 450002, China; gary1451@iccas.ac.cn (Z.W.)

\* Correspondence: songandong@henau.edu.cn

**Table S1.** Primers for site-directed mutagenesis of Mut2.

| Primer  | Sequence                            |
|---------|-------------------------------------|
| H78A-F  | ACAAGTT <u>GC</u> AGGCAACAACATTCTGG |
| H78A-R  | TTGTTGCCTGCAACTTGTCGAACGGT          |
| C119A-F | GCGGAT <u>GC</u> AATACCCGGTTCTGTTGG |
| C119A-R | CGGGTATGCATCCGCCACGAGGAC            |
| H136A-F | CGGTGG <u>CA</u> GTTGGCTGGCGTGGTG   |
| H136A-R | AGCCAAGTGCACCGCAGCAACGAC            |

The underlined bases indicate the mutated sites.

```

WT      1  MKMARNGKISYLEPEWITGSLRAGFTTRNGGISRAPYNSLNLGLNTEDPRPNVEGNRSTLVRAFGLLEVHQ
Mut1    1  MKMARNGKIYYLEPEWITGSLRAGFTTRNGGISRAPYNSLNLGLNTGDPNPVEGNRERLVRAFGLEPHQ
Mut2    1  MKMARNGKIYYLEPEWIHGSVRAGFTTRNGGISRPPYNSLNLGLNTGDPNPVEGNRERLVRAFGLEPHQ
Mut3    1  MKMARQGKIYYLEPEWIHGSVRAGFTTRNGGISRPYESLNGLNTGDPRENVEGNRERLVRAFGLEPHQ

WT      71  LLTVRQVHGNNILVVDEPNPDLSHFQQVECDAIISNQPGMMIGVLVADCYPVLLAAPAQGVVAHVHVGWR
Mut1    71  LLTVRQVHGNNILVVDEPNPDLSHFQQVECDAIISNQPGMMIGVLVADCYPVLLAAPANGVVAHVHVGWR
Mut2    71  LLTVRQVHGNNILVVDEPNPDLSHFQQVECDAIISNQPGMMIGVLVADCYPVLLAAPANGVVAHVHVGWR
Mut3    71  LLTVRQVHGNNILVVDEPNPDLSHFQQVECDAIISNQPGMMIGVLVADCYPVLLAAPANGVVAHVHVGWR

WT      141  GAVAQIIQRTVDALQEQQFGVCPPELLAAVGP GIGAHAYEVD RPVRDQFRKAGLPWAGVAEESRLGHWKLD
Mut1    141  GAVAQIIQRTVDALQEQQFGVRPEDLLAAVGP GIGACCYEVD RPVRDQFRKAGLPWEVAEESRLGHWKLD
Mut2    141  GAVAQIIQRTVDALQEQQFGVRPEDLLAAVGP GIGACCYEVD RPVRDQFRKAGEPWEVAEESRDGHWKLD
Mut3    141  GAVAQIIQRTVDAMQEQQFGVRPEDLLAAVGP GIGACCYEVD RPVRDQFRKAGGPWEVAEFSRDGHWKLD

WT      211  LRETCRRQLLTAGVVRTHIDLAEECTCCHRELLFSHRRDNGRTGRQLGFILLT
Mut1    211  LRETCRRQLLDAGVPREHIDLAEWCTCCHRELFFSHRRDNGRTGRQLGFILLT
Mut2    211  LREACRRQLLDAGVKAEHIDLAEWCTCCHRELFFSHRRDNGRTGRMLGFILLT
Mut3    211  LREACRRQLEDAGVKREHIYLAEWCTCCHRELFFSHRRDNGRTGRMLGFILLT

```

**Figure S1.** Sequence alignment of GhIac WT, Mut1, Mut2, and Mut3. The mutated residues are colored red.

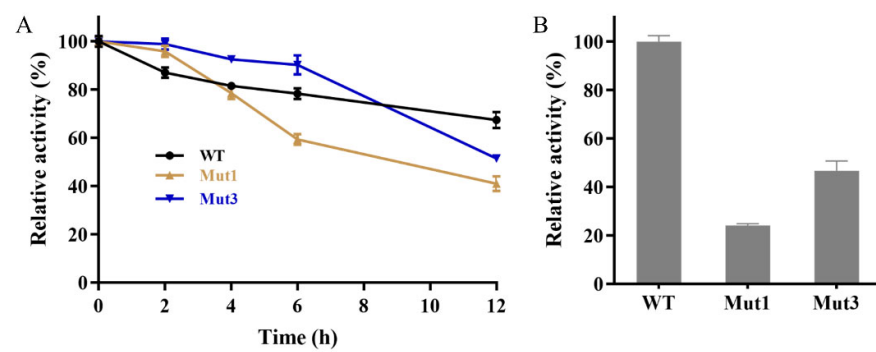

**Figure S2.** Thermostability at 50 °C (A) and activity against ABTS (B) of Mut1 and Mut3.

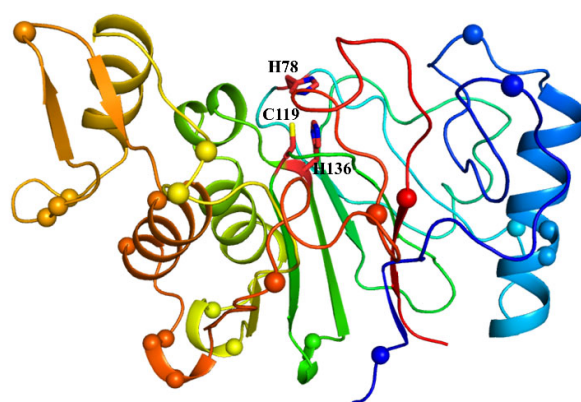

**Figure S3.** Structural mapping of the mutated residues of GhLac Mut2. The mutated residues are shown as spheres. H78, C119, and H136 are labeled.

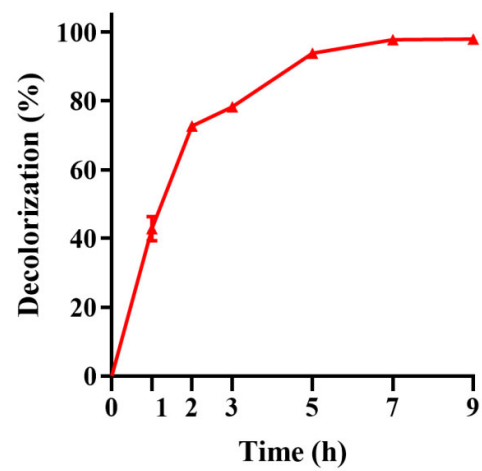

**Figure S4.** MG decolorization catalyzed by Ghlac WT. MG at the concentration of 100 mg/L was decolorized by 40 U/L of Ghlac WT with 0.1 mM ABTS at 70 °C.
